# Supplementary material for: The relationship between the chemical state of Pd species and the catalytic activity for methane combustion on Pd/CeO2
Source: Royal Society of Chemistry journal article supplement (doi:10.1039/c8cy00208h), 2018-01-01
Supplement: c8cy00208h1.pdf [file c8cy00208h1.pdf]

Electronic Supplementary Material (ESI) for Catalysis Science & Technology

## **The relationship between chemical state of Pd species and catalytic activity of methane combustion on Pd/CeO<sub>2</sub>**

Jian Ma<sup>†a</sup>, Yang Lou<sup>†b</sup>, Yafeng Cai<sup>a</sup>, Zhenyang Zhao<sup>a</sup>, Li Wang<sup>\*a</sup>, Wangcheng Zhan<sup>a</sup>, Yanglong Guo<sup>a</sup>, Yun Guo<sup>\*a</sup>

<sup>a</sup> Key Laboratories for Advanced Materials, Research Institute of Industrial Catalysis, East China

University of Science and Technology, Shanghai 200237, P. R. China

<sup>b</sup> Department of Physics, Arizona State University, Tempe, Arizona 85287, United States

### **AUTHOR INFORMATION**

#### **\*Corresponding Author**

Tel/Fax: +86-21-64253703; Email: yunguo@ecust.edu.cn; wangli@ecust.edu.cn

#### **Author Contributions**

<sup>†</sup>: These two authors contributed equally to this paper.

**Table of Contents**

**Fig. S1** Pd 3d XPS spectra of Pd/CeO<sub>2</sub> catalysts after stability test

**Fig. S2** Pd 3d XPS spectra of Pd/CeO<sub>2</sub> catalysts with low Pd loading

**Fig. S3** Data details for H<sub>2</sub>-TPR

**Table S1** the peak area for each peak from the H<sub>2</sub>-TPR results

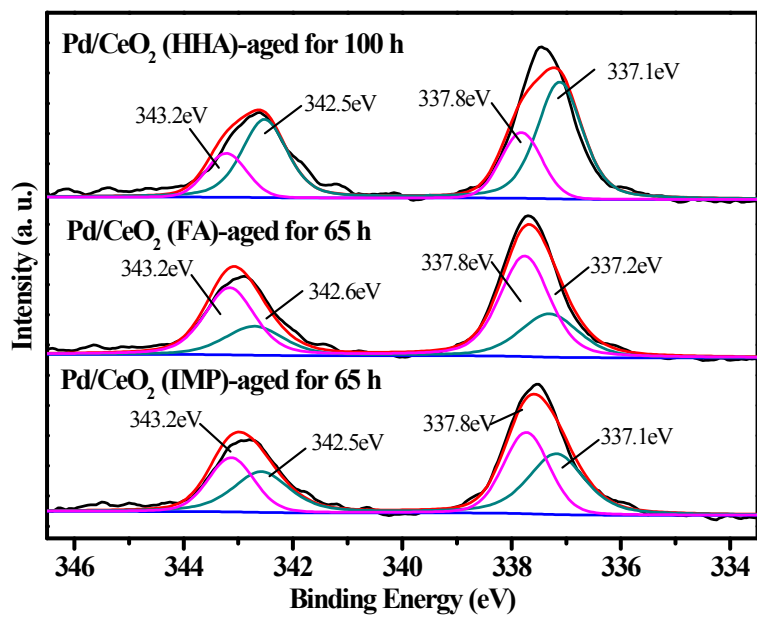

Fig. S1 Pd 3d XPS spectra of Pd/CeO<sub>2</sub> catalysts after stability test

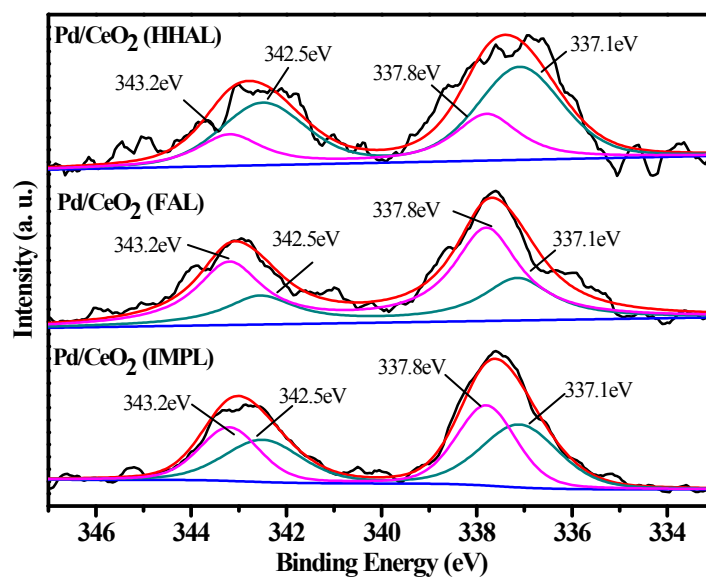

Fig. S2 Pd 3d XPS spectra of Pd/CeO<sub>2</sub> catalysts with low Pd loading

### Data details for H<sub>2</sub>-TPR Calibration by CuO

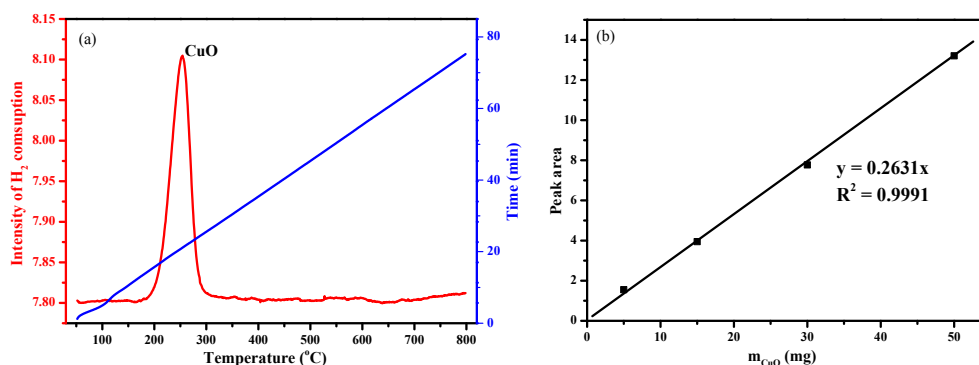

**Fig. S3 H<sub>2</sub>-TPR profile for 50 mg of CuO (a); the Peak area of H<sub>2</sub> consumption by CuO with different mass (b).**

H<sub>2</sub>-TPR measurement of CuO with different mass is carried on and the H<sub>2</sub>-TPR profile for 50 mg of CuO is shown in Fig S1(a), then Peak area of H<sub>2</sub> consumption is integrated and shown in Fig S1(b). The relationship of peak area (A) and the mass of CuO (m<sub>CuO</sub>) follows the equation S1:

$$A = 0.2631 \times m_{\text{CuO}} \quad [\text{S1}]$$

**Table S1 Peak area (A) of each peak from the H<sub>2</sub>-TPR results**

| Catalysts                 | Peak( $\alpha$ ) |       | Peak( $\beta$ ) |       | Peak( $\varphi$ ) |       | Peak( $\gamma$ ) |       | Peak( $\delta$ ) |       | Peak( $\eta$ ) |       |
|---------------------------|------------------|-------|-----------------|-------|-------------------|-------|------------------|-------|------------------|-------|----------------|-------|
|                           | T/°C             | A     | T/°C            | A     | T/°C              | A     | T/°C             | A     | T/°C             | A     | T/°C           | A     |
| Pd/CeO <sub>2</sub> (HHA) | -12              | 0.081 | -/              | -     | 21                | 0.886 | -                | -     | 171              | 0.055 | 682            | 0.531 |
| Pd/CeO <sub>2</sub> (FA)  | -12              | 0.033 | 18              | 0.157 | -                 | -     | 53               | 0.553 | 177              | 0.051 | 678            | 0.54  |
| Pd/CeO <sub>2</sub> (IMP) | -11              | 0.060 | 31              | 0.162 | -                 | -     | 58               | 0.621 | 173              | 0.049 | 674            | 0.588 |
| CeO <sub>2</sub> nanorods | -                | -     | -               | -     | -                 | -     | -                | -     | 181              | 0.65  | 701            | 0.653 |

The peak area of each H<sub>2</sub> consumption peak in Fig. 6 is shown in Table S2. The relationship of peak area and the H<sub>2</sub> uptake follows the equation S2:

$$\text{H}_2 \text{ uptake} = 956 \times A \quad [\text{S2}]$$
